# Supplementary material
Source: publisher site journal article supplement (https://www.dovepress.com/article/604786)
Supplement: Supplementary file 1 [file Additional%20file1.docx]

**Figure S1** The flow chart.


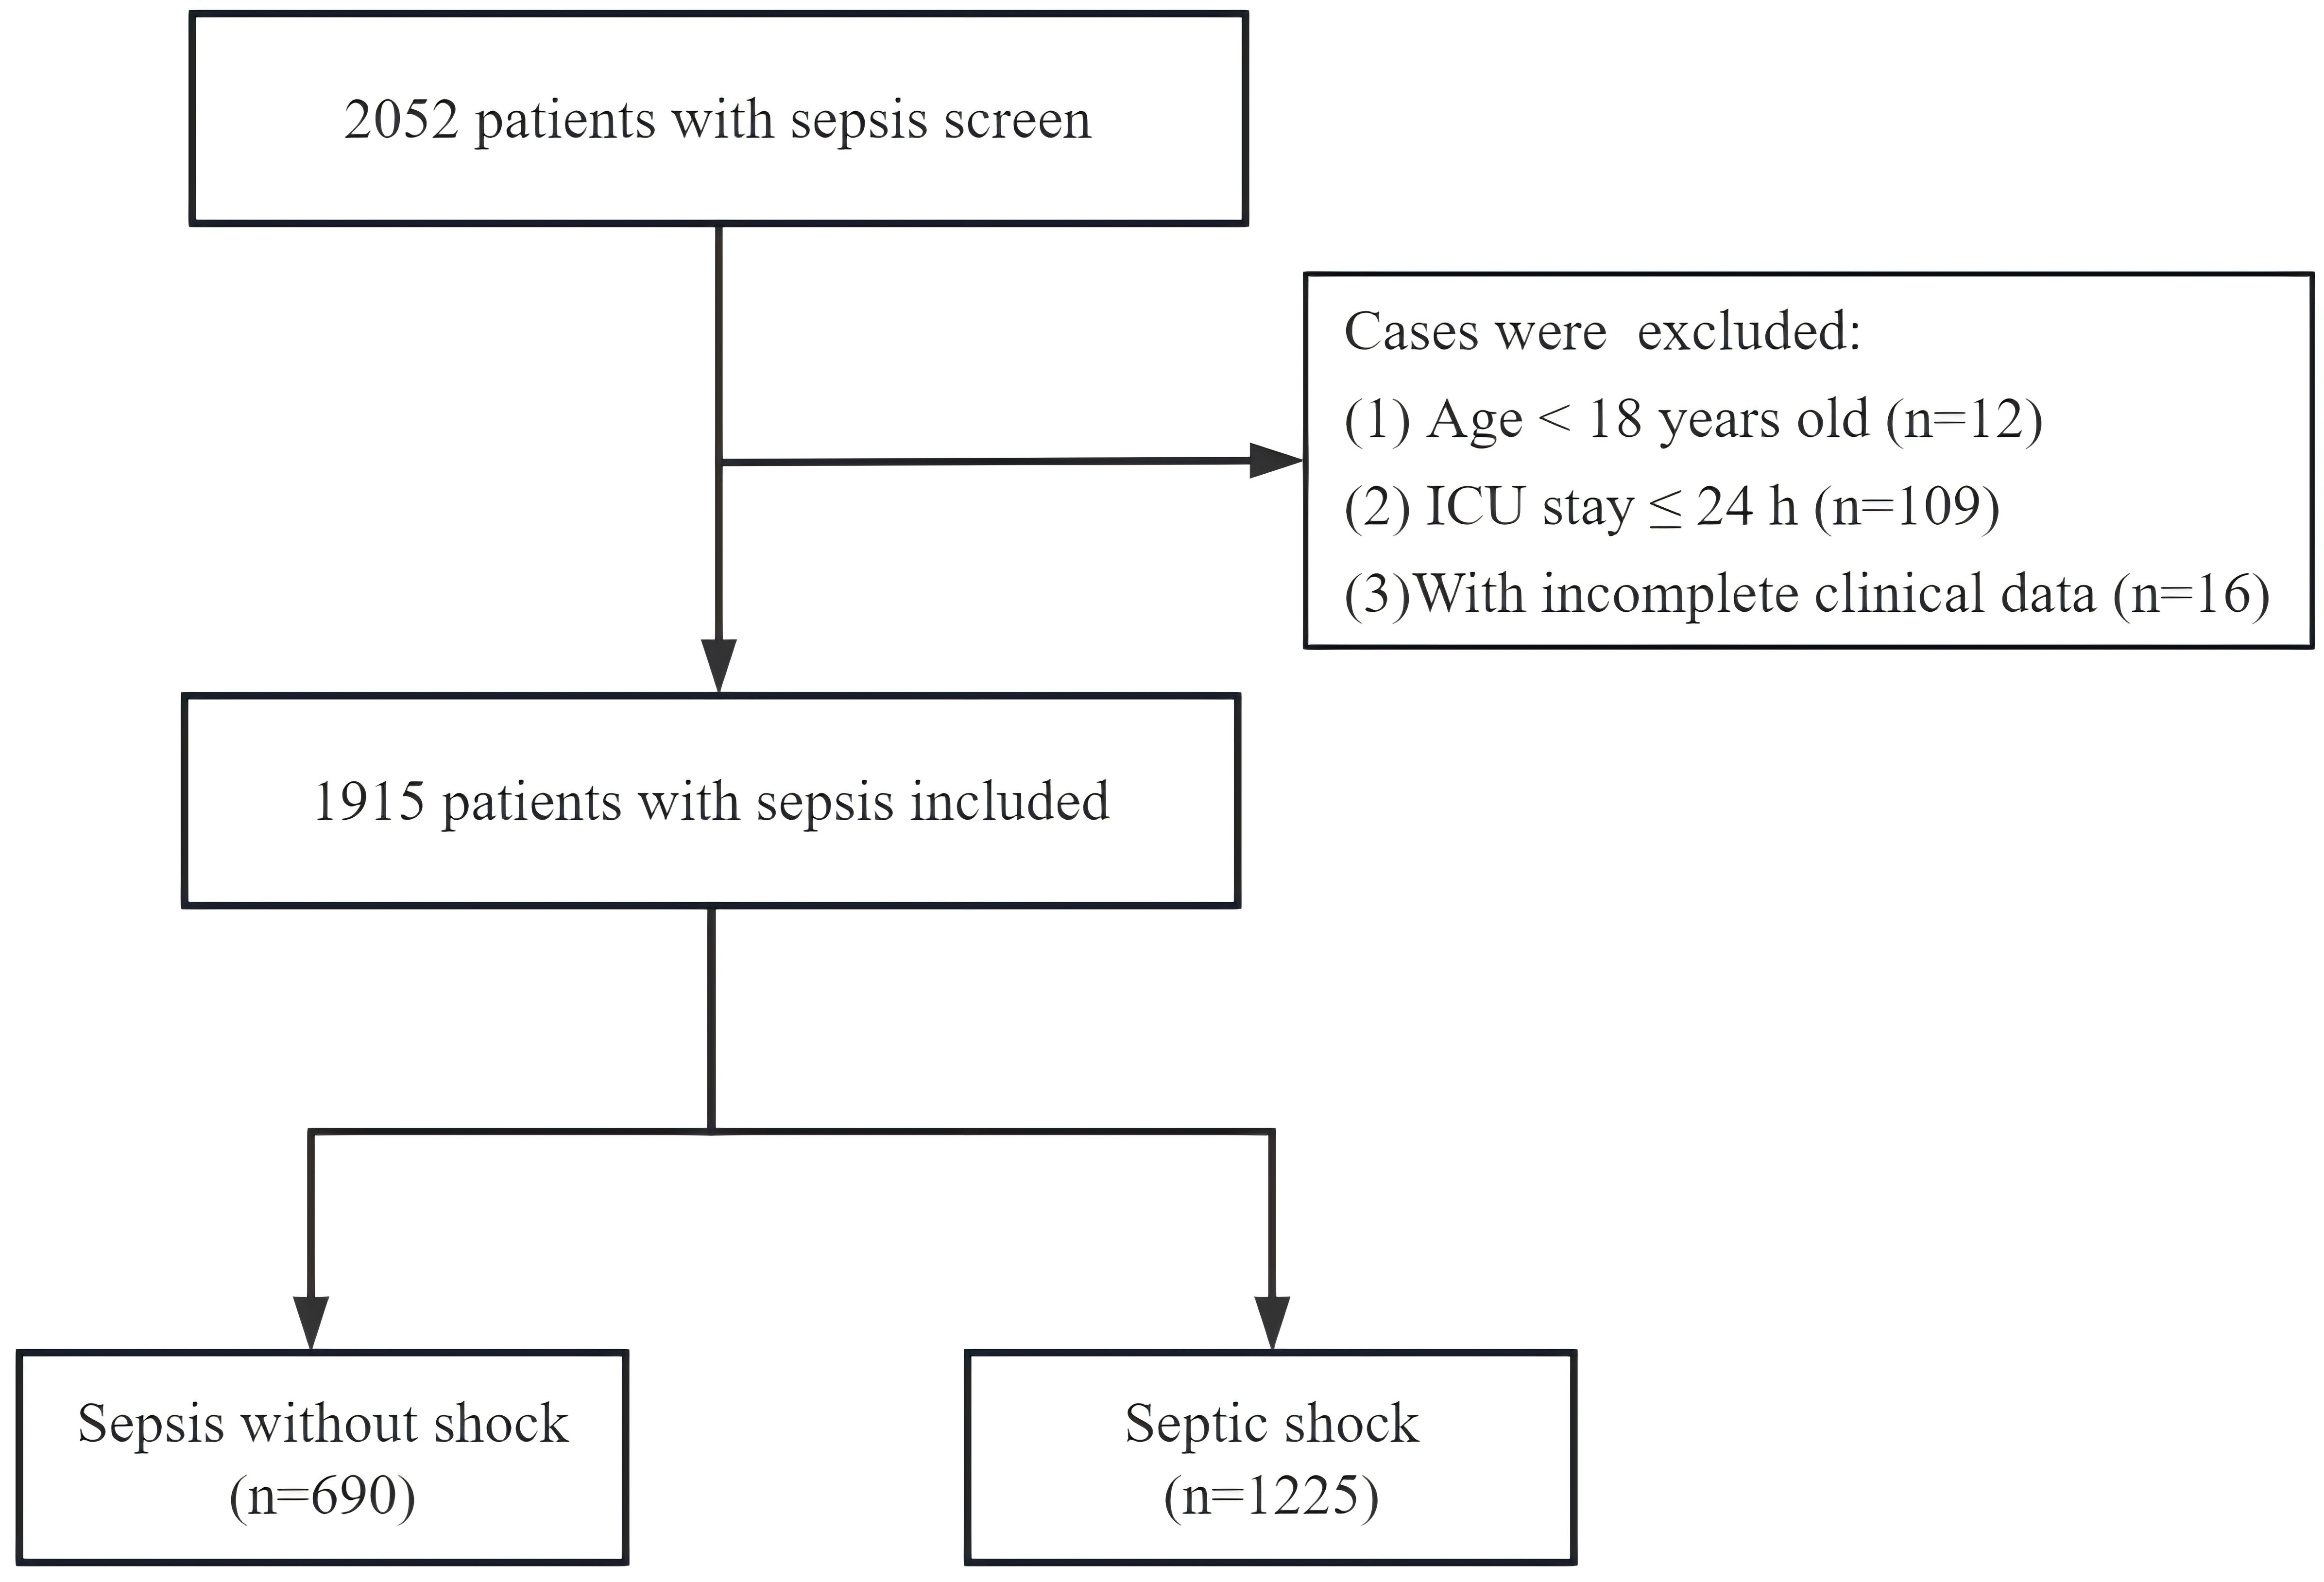


**Figure S2** The association of PNI, NRI, and CONUT scores with ICU mortality in sepsis patients.

**Figure S3** Cut-off values of PNI, NRI, and CONUT scores with ICU mortality in sepsis patients.

**Figure S4** Venn diagram of the number of patients with malnutrition diagnosed using different diagnostic criteria.


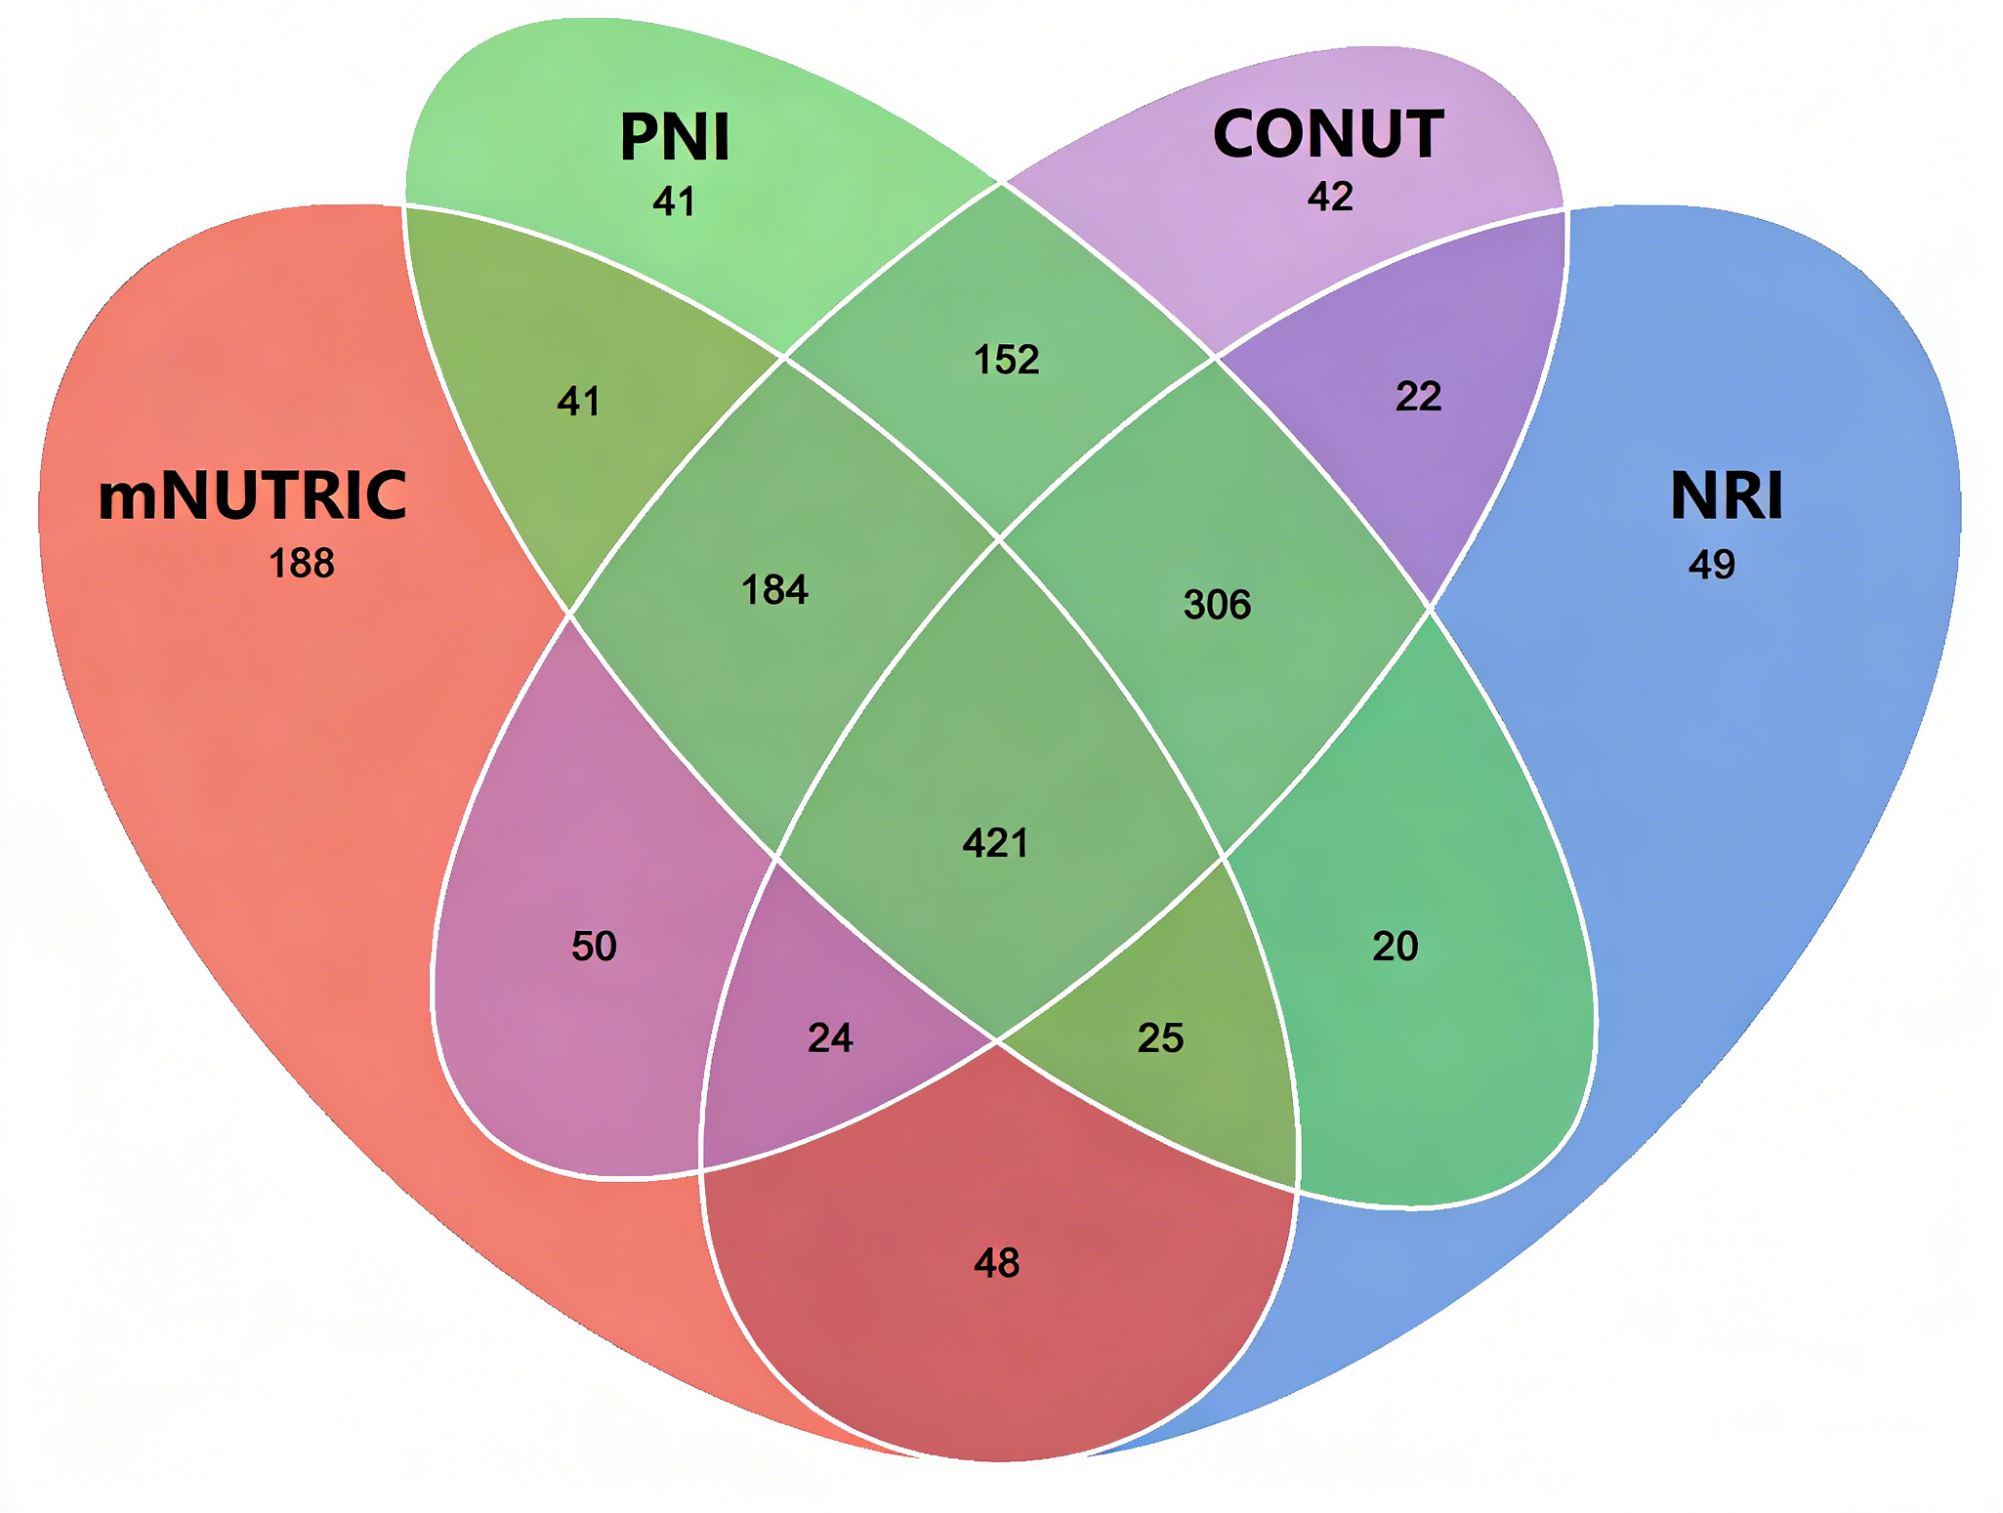


**Figure S5** The Kaplan-Meier curves of sepsis patients with malnutrition and no malnutrition based on mNUTRIC index.


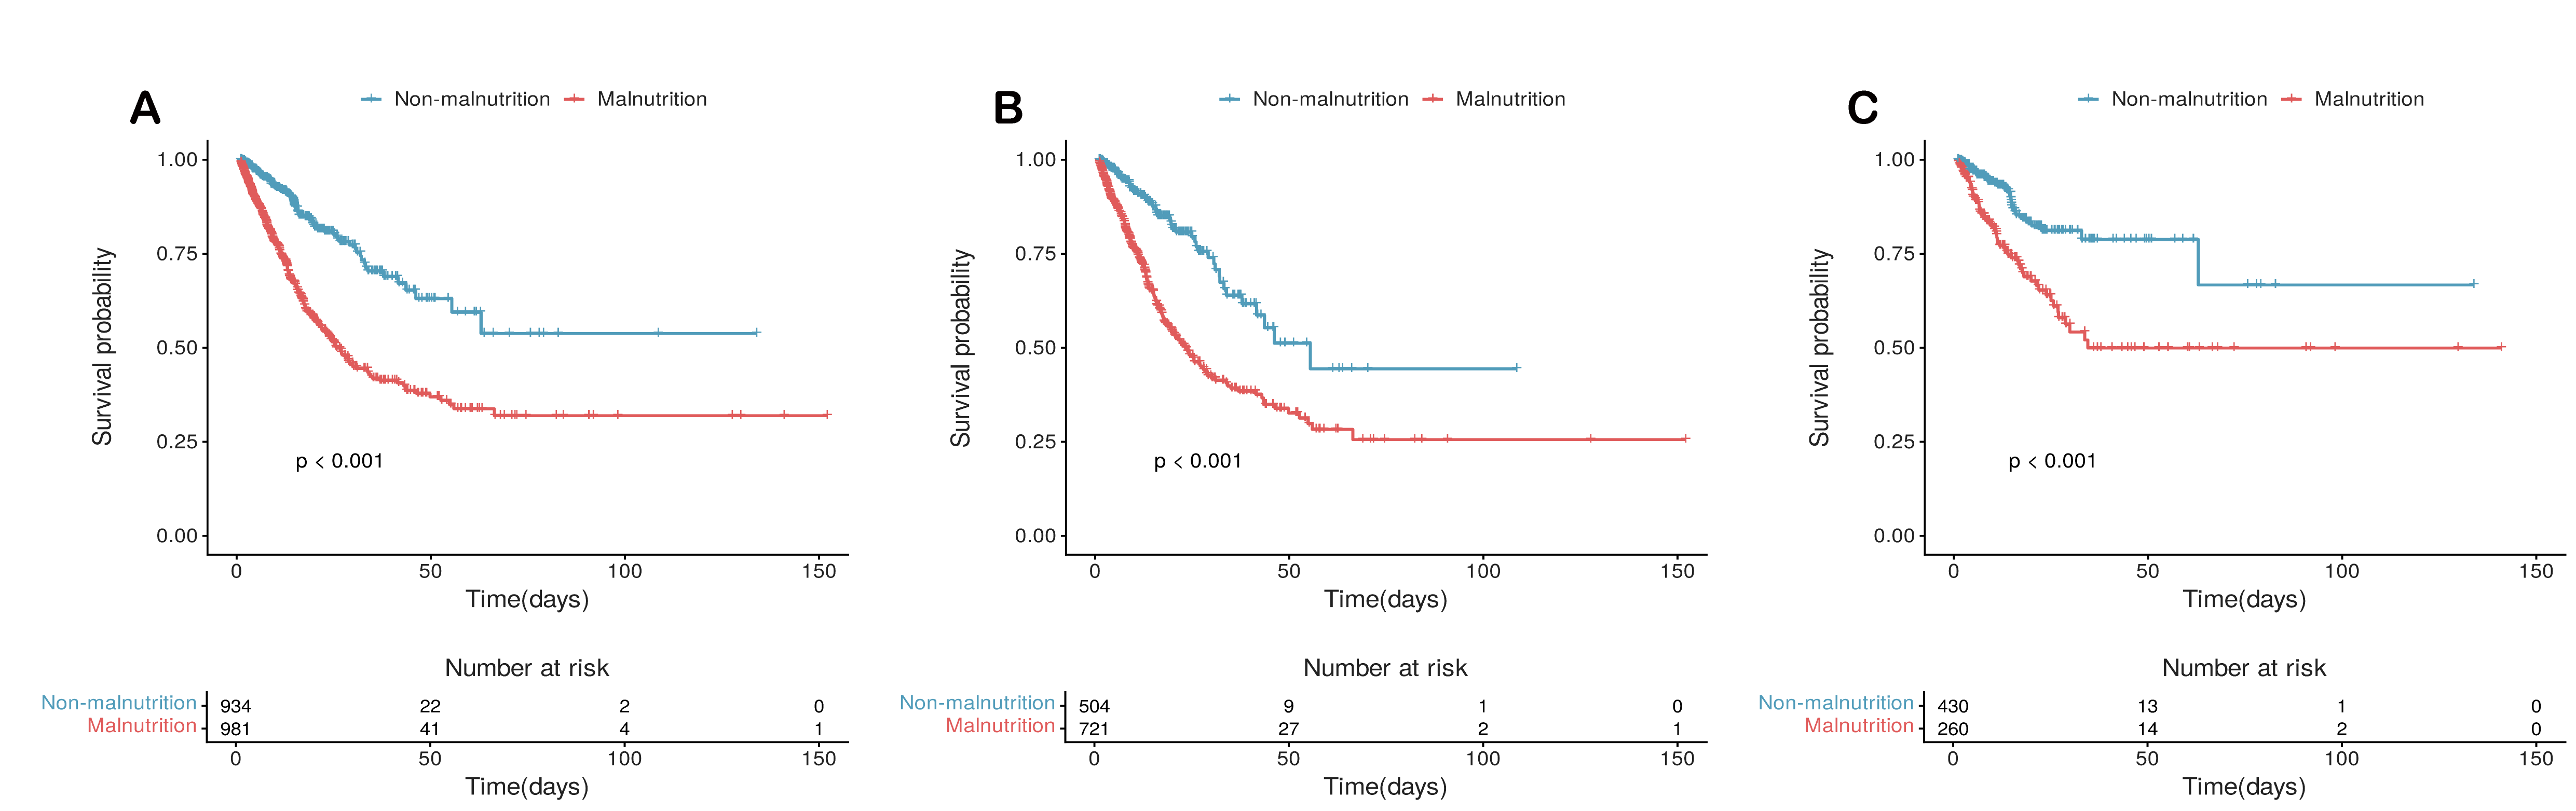


Notes: A. total population; B. patients with septic shock; C. patients with sepsis without shock.

**Figure S6** The Kaplan-Meier curves of sepsis patients with malnutrition and no malnutrition based on PNI index.


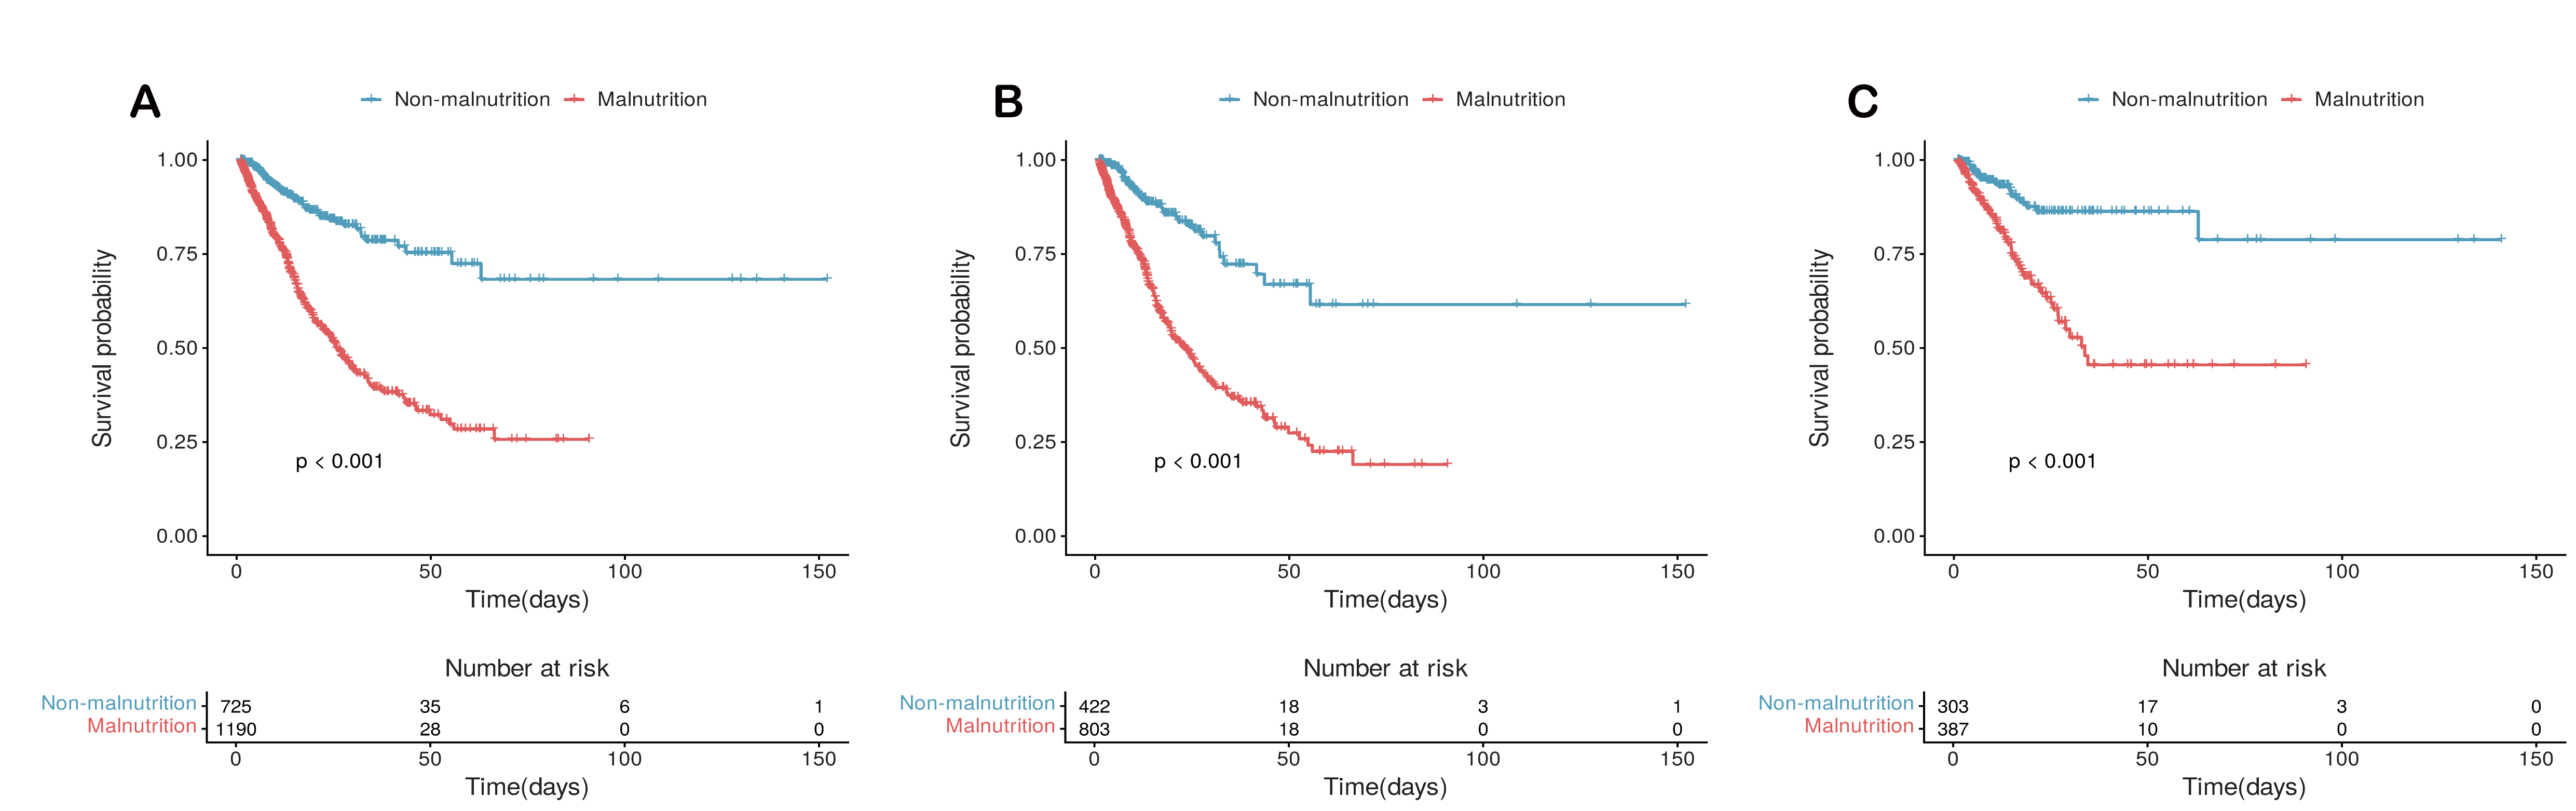


Notes: A. total population; B. patients with septic shock; C. patients with sepsis without shock.

**Figure S7** The Kaplan-Meier curves of sepsis patients with malnutrition and no malnutrition based on NRI index.


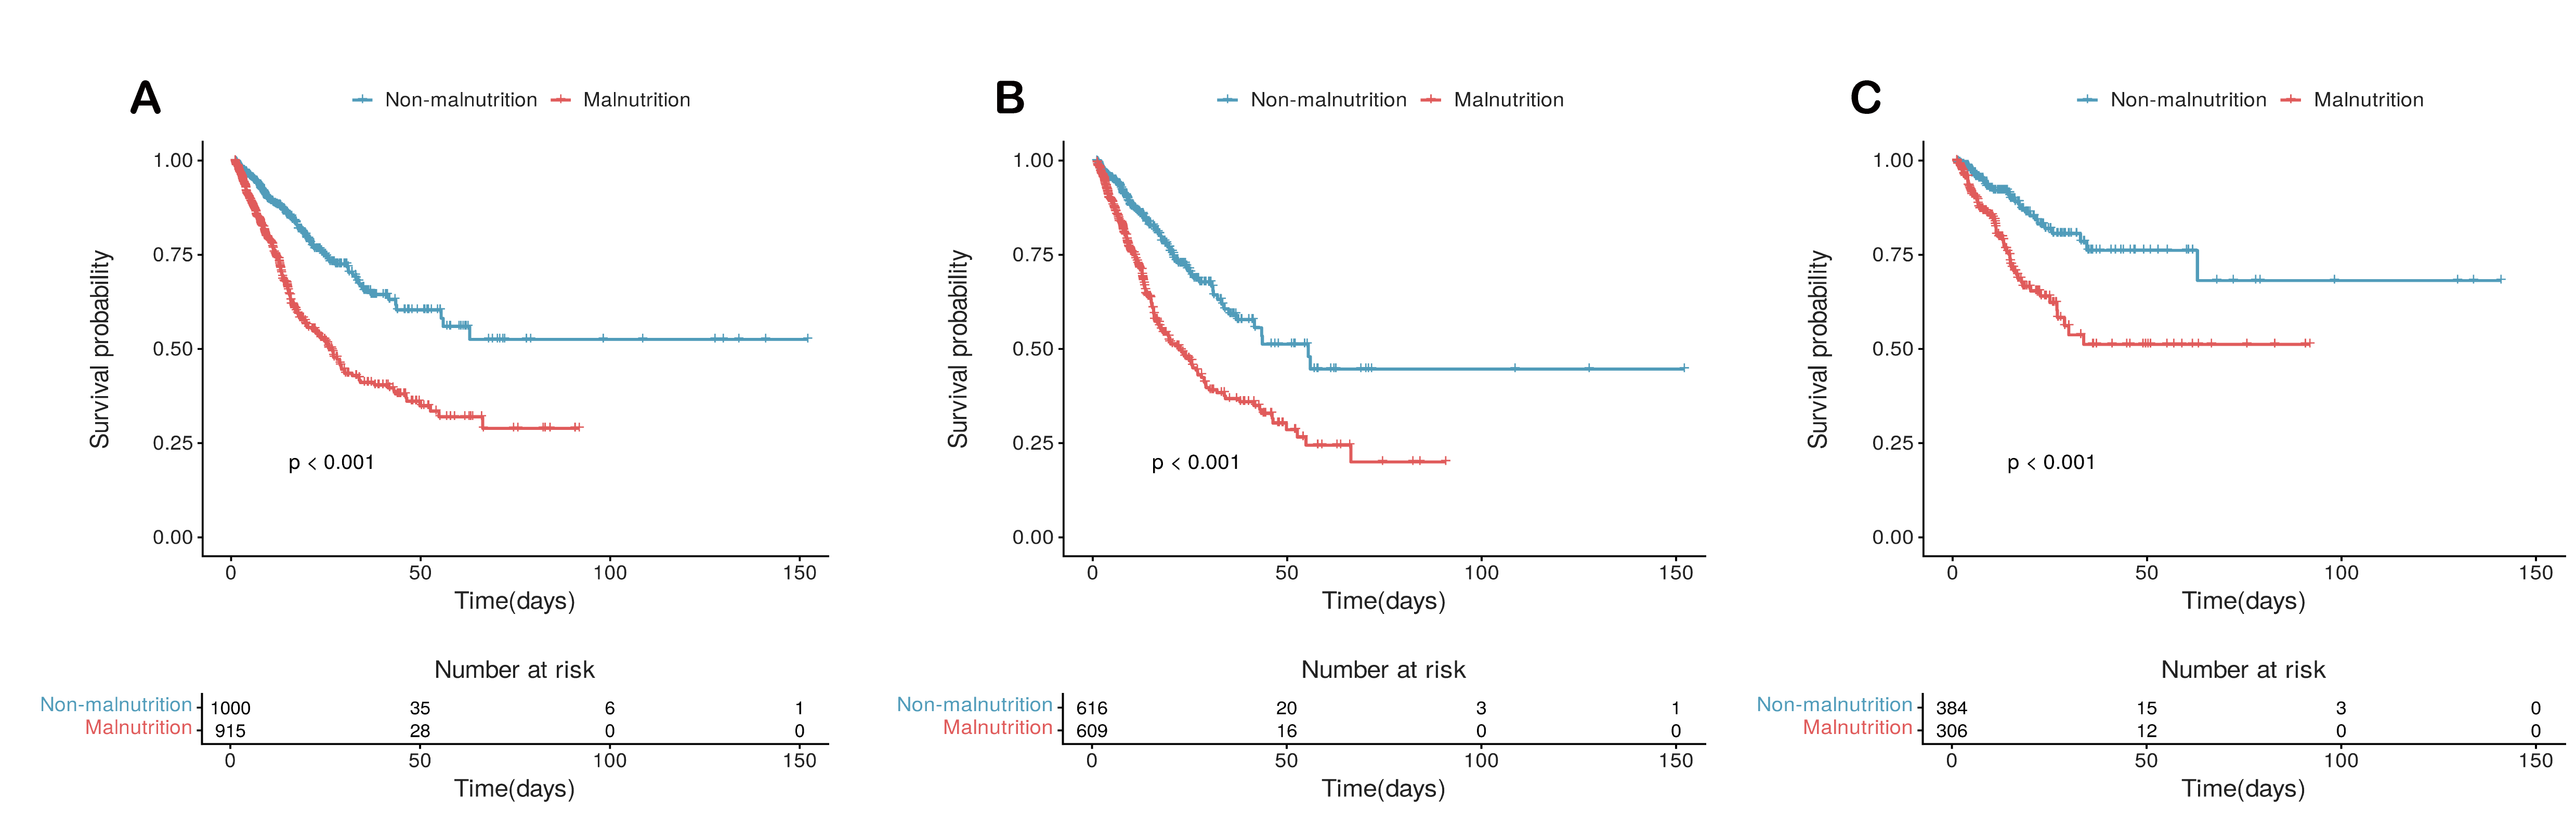


Notes: A. total population; B. patients with septic shock; C. patients with sepsis without shock.

**Figure S8** The Kaplan-Meier curves of sepsis patients with malnutrition and no malnutrition based on CONUT index.


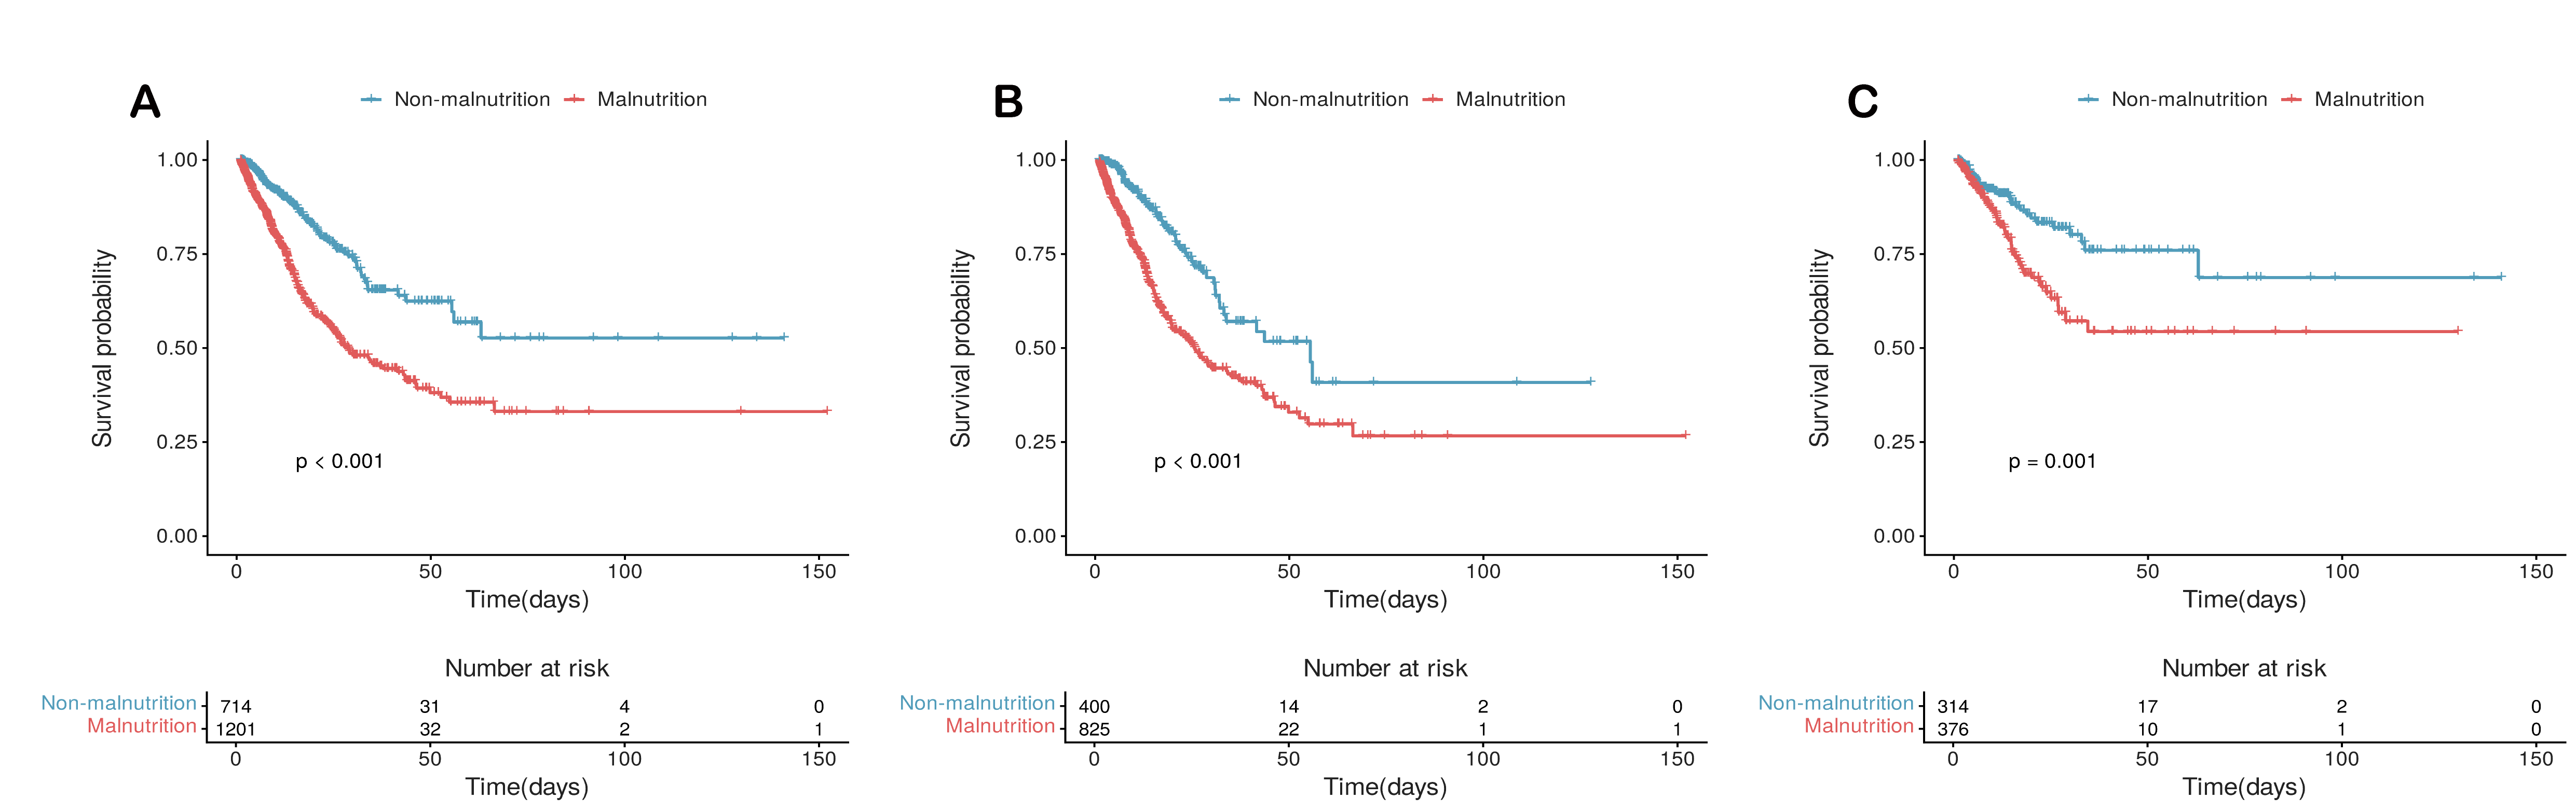


Notes: A. total population; B. patients with septic shock; C. patients with sepsis without shock.

**Figure S9** The coefficient bar plot of LASSO regression.

Notes: The x-axis displays LASSO coefficient values, with red bars denoting positive correlations and blue bars denoting negative ones.

*ANC*: Absolute Neutrophil Count; *BUN*: Blood Urea Nitrogen; *Hb*: Hemoglobin; *Lac*: Lactate; *PA*: Prealbumin; *PCT*: Procalcitonin; *PLT*: Platelet; *TG*: Triglyceride

**Figure S10** ROC analysis of nutrition-related indicators for discriminating ICU mortality in patients with sepsis by excluding patients with short-term deaths(72 hours).


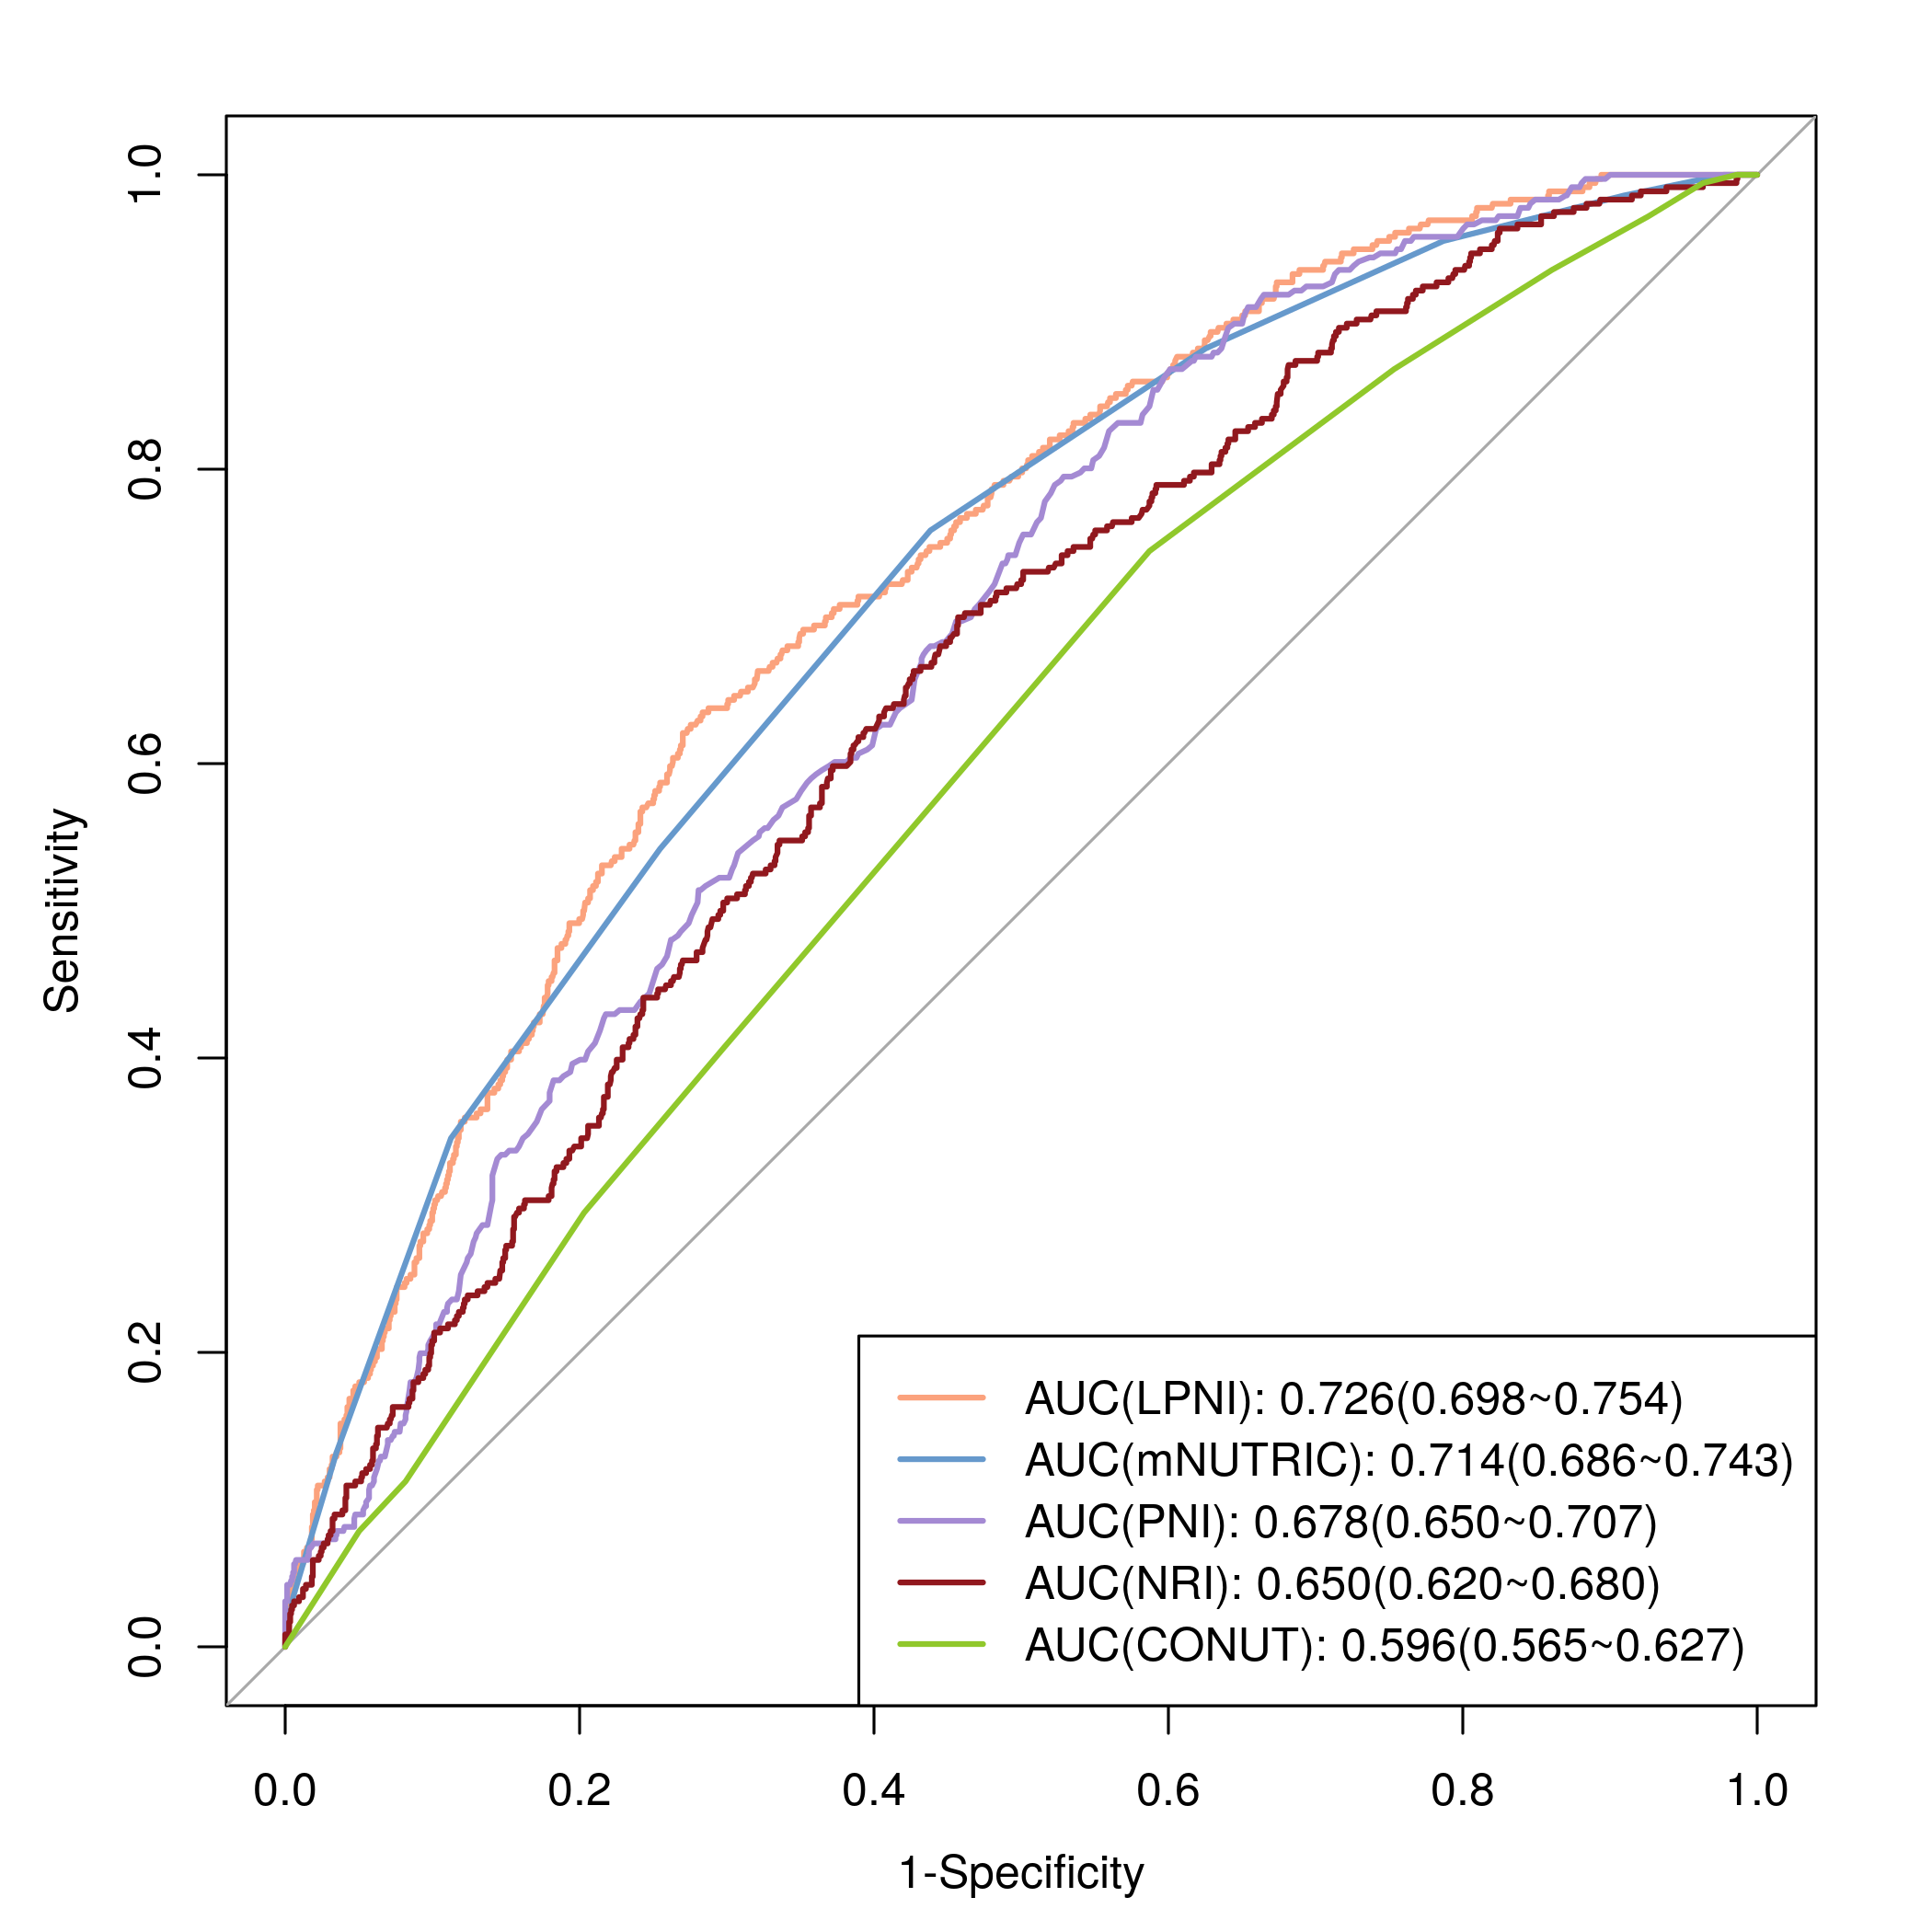


**Figure S11** ROC analysis of nutrition-related indicators for discriminating ICU mortality in patients with sepsis.

Notes: A. train cohort; B. test cohort.

**Table S1** Characteristics of sepsis patients grouped by LPNI-derived nutritional status

| **Variables** | **Total**  **(n = 1915)** | **No malnutrition**  **(n = 1555)** | **Malnutrition**  **(n = 360)** | ***P*** |
| --- | --- | --- | --- | --- |
|
| Age, years | 65.70 ± 16.44 | 65.87 ± 16.41 | 64.95 ± 16.59 | 0.340 |
| Male sex, *n*(%) | 1258 (65.69) | 1029 (66.17) | 229 (63.61) | 0.356 |
| BMI, kg/m2 | 23.51 ± 4.12 | 23.63 ± 4.18 | 22.99 ± 3.83 | 0.009 |
| Presumed site of infection causing sepsis, n(%) |  |  |  | <0.001 |
| Respiratory tract | 1006 (52.53) | 851 (54.73) | 155 (43.06) |  |
| Intra-abdominal | 530 (27.68) | 391 (25.14) | 139 (38.61) |  |
| Urinary tract | 155 (8.09) | 130 (8.36) | 25 (6.94) |  |
| Bloodstream | 67 (3.50) | 55 (3.54) | 12 (3.33) |  |
| Skin and soft tissue | 59 (3.08) | 47 (3.02) | 12 (3.33) |  |
| Central nervous system | 53 (2.77) | 46 (2.96) | 7 (1.94) |  |
| Other | 45 (2.35) | 35 (2.25) | 10 (2.78) |  |
| Septic shock, *n*(%) | 1225 (63.97) | 927 (59.61) | 298 (82.78) | <0.001 |
| APACHE II score | 19.00 (14.00, 25.00) | 18.00 (13.00, 23.00) | 23.00 (17.00, 30.00) | <0.001 |
| SOFA score | 7.00 (4.00, 10.00) | 7.00 (4.00, 9.00) | 10.00 (7.00, 13.00) | <0.001 |
| Comorbid conditions, n(%) |  |  |  |  |
| Hypertension | 975 (50.91) | 801 (51.51) | 174 (48.33) | 0.277 |
| Cerebrovascular disease, n(%) | 597 (31.17) | 499 (32.09) | 98 (27.22) | 0.072 |
| Diabetes mellitus | 547 (28.56) | 440 (28.30) | 107 (29.72) | 0.589 |
| Solid tumor, n(%) | 371 (19.37) | 276 (17.75) | 95 (26.39) | <0.001 |
| Chronic kidney disease, n(%) | 335 (17.49) | 234 (15.05) | 101 (28.06) | <0.001 |
| Coronary artery disease | 334 (17.44) | 277 (17.81) | 57 (15.83) | 0.372 |
| Chronic pulmonary disease, n(%) | 200 (10.44) | 168 (10.80) | 32 (8.89) | 0.284 |
| CCI score | 2 (1, 3) | 2 (0, 3) | 2 (1, 3) | <0.001 |
| Mechanical ventilation, n(%) | 1797 (93.84) | 1452 (93.38) | 345 (95.83) | 0.081 |
| CRRT, n(%) | 465 (24.28) | 361 (23.22) | 104 (28.89) | 0.024 |
| ECMO, n(%) | 83 (4.33) | 64 (4.12) | 19 (5.28) | 0.329 |
| ICU length of stay, days | 9.07 (4.37, 16.74) | 9.60 (4.74, 17.61) | 6.79 (3.12, 14.83) | <0.001 |
| 28-d ICU-free days | 15.00 (0.00, 22.00) | 16.38 (0.00, 22.94) | 0.00 (0.00, 19.56) | <0.001 |
| ICU mortality, n(%) | 423 (22.09) | 243 (15.63) | 180 (50.00) | <0.001 |

**Abbreviations:** BMI, body mass index; APACHE II, acute physiology and chronic health evaluation II; SOFA, sequential organ failure assessment; CCI, charlson comorbidity index; CRRT, continuous renal replacement therapy; ECMO, extracorporeal membrane oxygenation; ICU, intensive care unit.
